# Supplementary material for: Synergistic Effects of Co3O4-gC3N4-Coated ZnO Nanoparticles: A Novel Approach for Enhanced Photocatalytic Degradation of Ciprofloxacin and Hydrogen Evolution via Water Splitting
Source: MDPI journal article supplement (doi:10.3390/ma17051059), 2024-02-25
Supplement: s1 [file s1]

Supplementary Materials

# Synergistic Effects of $\text{Co}_3\text{O}_4$ - $\text{gC}_3\text{N}_4$ -Coated $\text{ZnO}$ Nanoparticles: A Novel Approach for Enhanced Photocatalytic Degradation of Ciprofloxacin and Hydrogen Evolution via Water Splitting

Abniel Machín <sup>1,\*</sup>, Carmen Morant <sup>2</sup>, Loraine Soto-Vázquez <sup>3</sup>, Edgard Resto <sup>3</sup>, José Ducongé <sup>4</sup>, María Cotto <sup>4</sup>, Pedro J. Berrios-Rolón <sup>4</sup>, Cristian Martínez-Perales <sup>4</sup> and Francisco Márquez <sup>4,\*</sup>

<sup>1</sup> Environmental Catalysis Research Lab, Division of Science, Technology and Environment, Cupey Campus, Universidad Ana G. Méndez, Cupey, PR 00926, USA

<sup>2</sup> Department of Applied Physics, Autonomous University of Madrid, and Instituto de Ciencia de Materiales Nicolás Cabrera, 28049 Madrid, Spain; c.morant@uam.es

<sup>3</sup> Materials Characterization Center Inc., Molecular Sciences Research Center, University of Puerto Rico, San Juan, PR 00926, USA; loraine.soto@mcc.com.pr (L.S.-V.); restoe@mcc.com.pr (E.R.)

<sup>4</sup> Nanomaterials Research Group, Department of Natural Sciences and Technology, Division of Natural Sciences, Technology and Environment, Universidad Ana G. Méndez-Gurabo Campus, Gurabo, PR 00778, USA; jduconge@uagm.edu (J.D.); mcotto48@uagm.edu (M.C.); berriosp1@uagm.edu (P.J.B.-R.); cmartinez372@email.uagm.edu (C.M.-P.)

\* Correspondence: machina1@uagm.edu (A.M.); fmarquez@uagm.edu (F.M.); Tel.: +1-787-878-2612 (ext. 220) (A.M.); +1-787-743-7979 (ext. 4250) (F.M.)

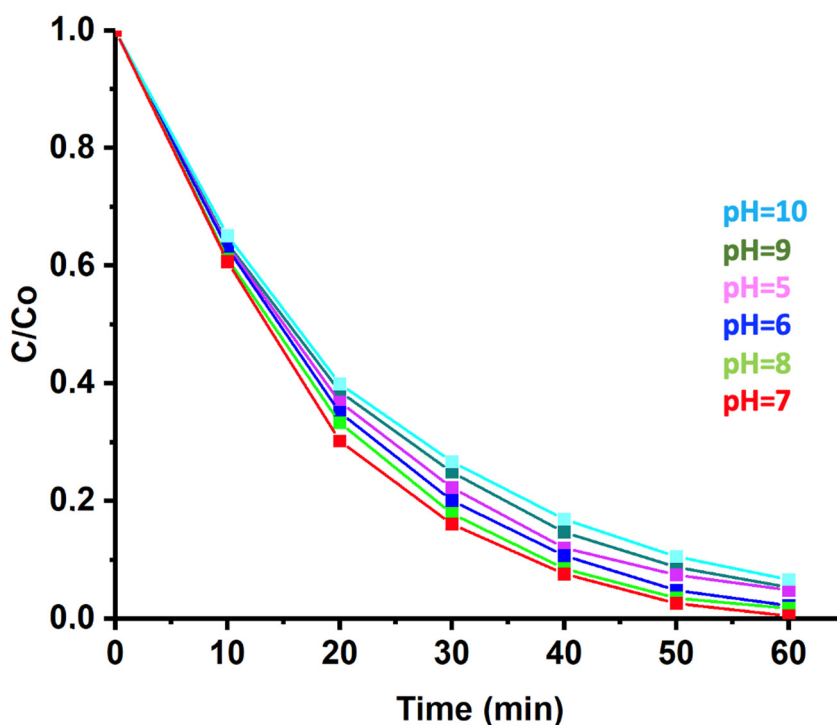

**Figure S1.** Photocatalytic activity of 5%( $\text{Co}_3\text{O}_4$ - $\text{gC}_3\text{N}_4$ )@ZnONPs on the photodegradation of CFX under irradiation at different pH.

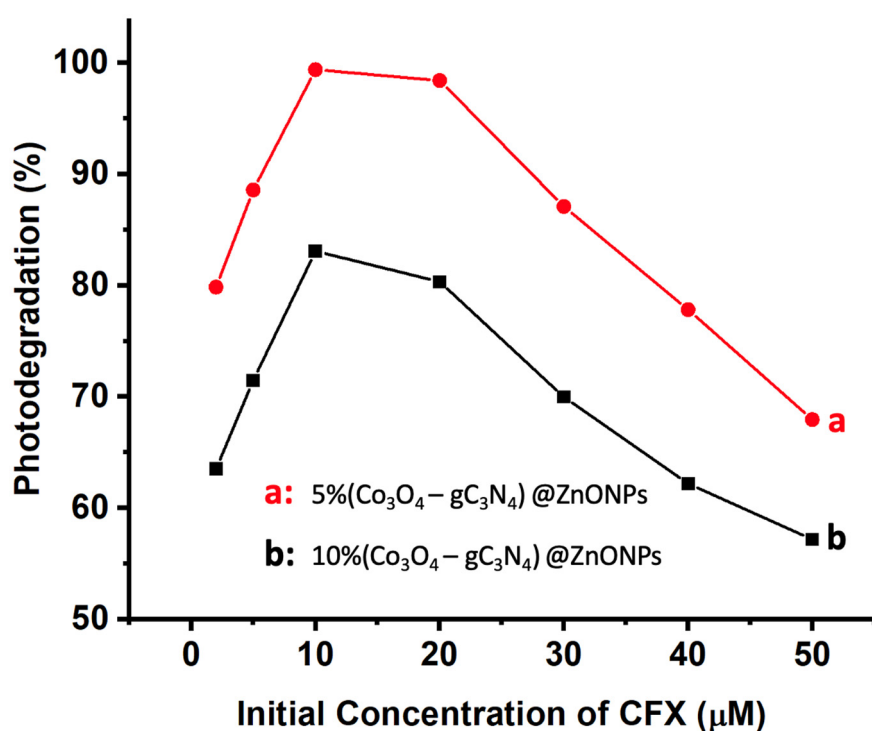

**Figure S2.** Photocatalytic activity of 5%(Co<sub>3</sub>O<sub>4</sub>-gC<sub>3</sub>N<sub>4</sub>)@ZnONPs on the photodegradation of CFX under irradiation at different pH.

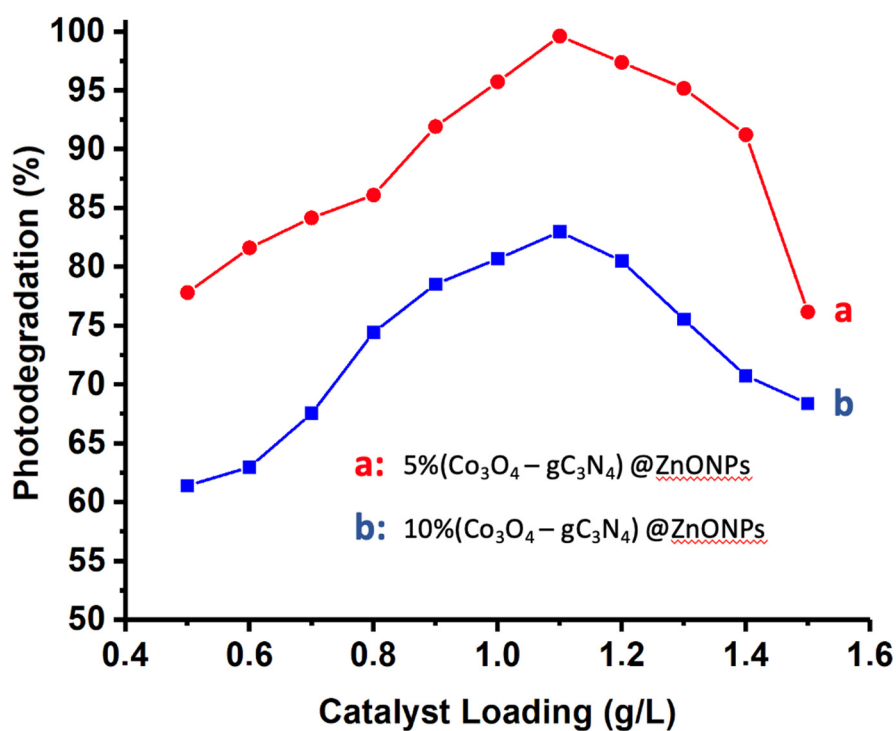

**Figure S3.** Evaluation of the initial concentration of 5%(Co<sub>3</sub>O<sub>4</sub>-gC<sub>3</sub>N<sub>4</sub>)@ZnONPs (a), and 10%(Co<sub>3</sub>O<sub>4</sub>-gC<sub>3</sub>N<sub>4</sub>)@ZnONPs (b) on the efficiency of the photodegradation reaction of CFX.

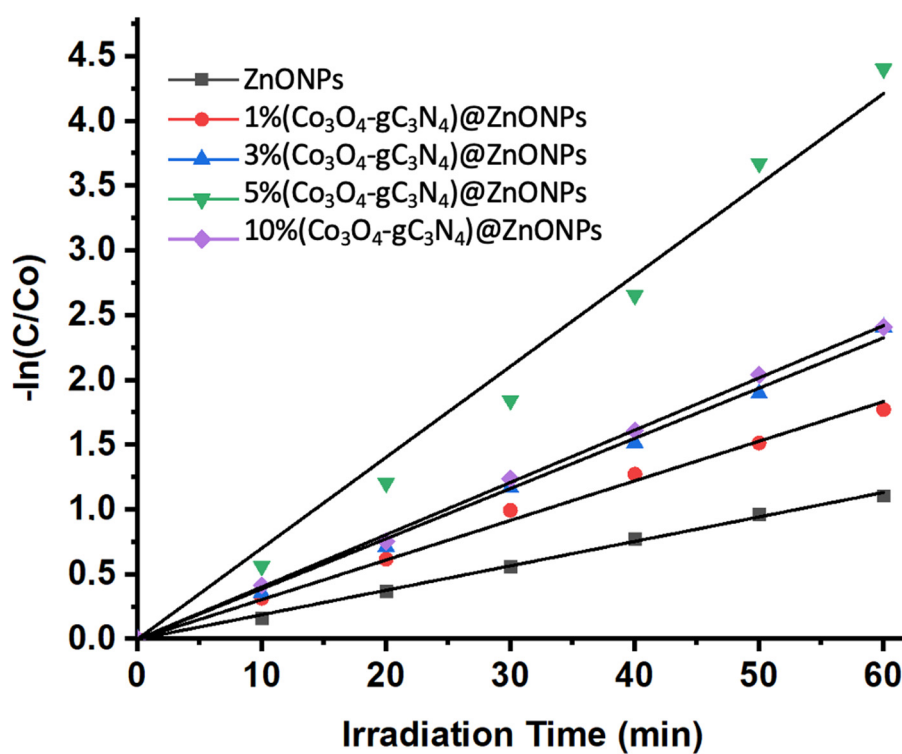

Figure S4. First-order kinetic plots of  $-\ln(C/C_0)$  versus irradiation time, using different catalysts.

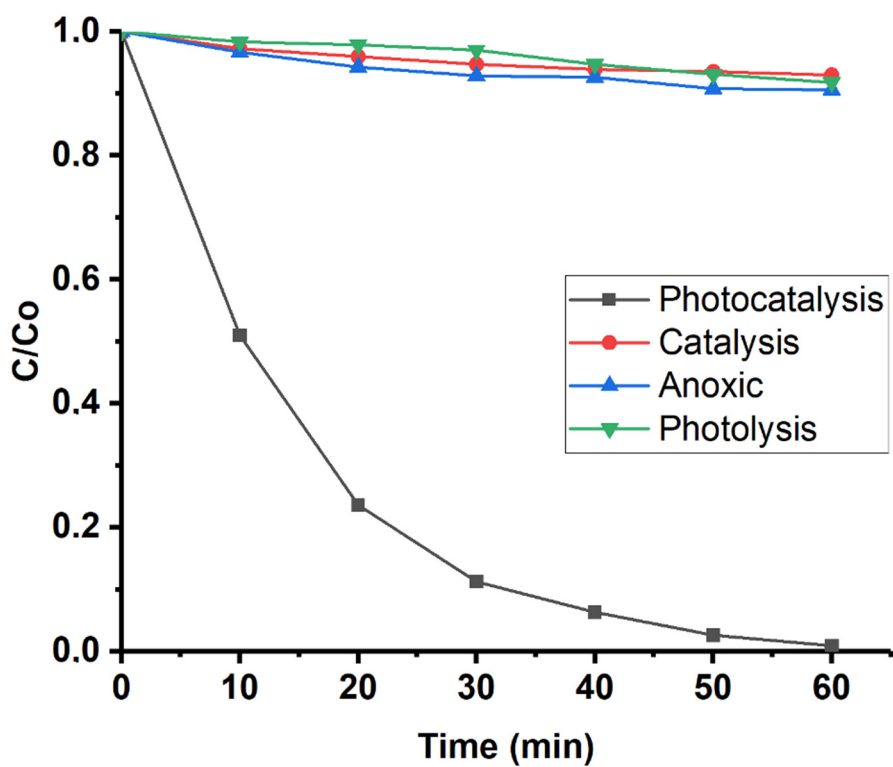

Figure S5. Control experiments for 5%  $(\text{Co}_3\text{O}_4\text{-gC}_3\text{N}_4)\text{@ZnONPs}$  with CFX, under irradiation.

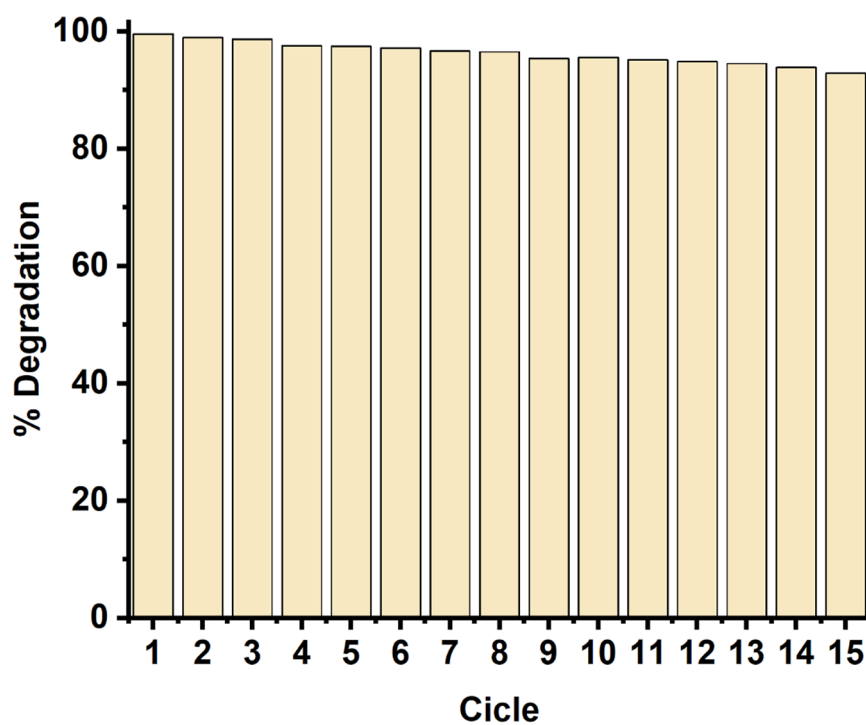

**Figure S6.** Recyclability of 5%(Co<sub>3</sub>O<sub>4</sub>-gC<sub>3</sub>N<sub>4</sub>)@ZnONPs after 15 consecutive catalytic cycles of photodegradation of CFX under irradiation.

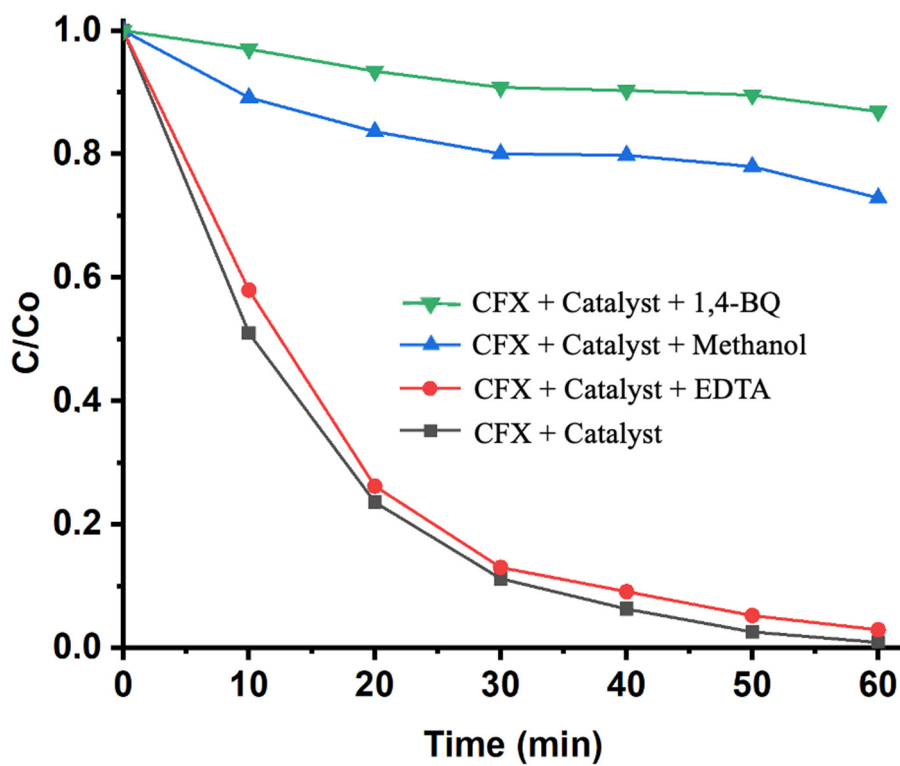

**Figure S7.** Photodegradation of CFX by 5%(Co<sub>3</sub>O<sub>4</sub>-gC<sub>3</sub>N<sub>4</sub>)@ZnONPs in the presence of various scavengers.

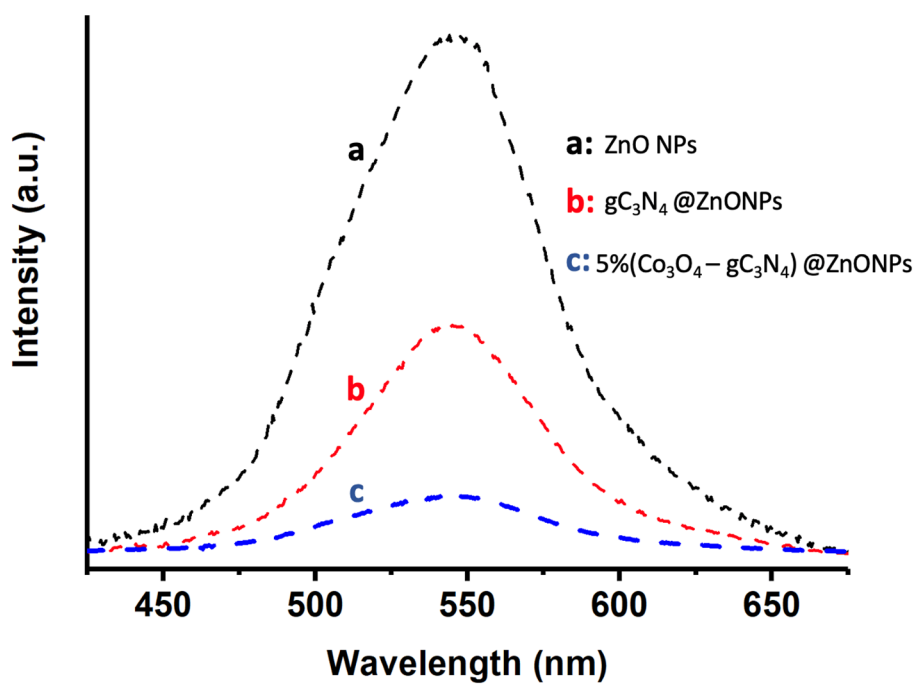

Figure S8. PL spectra of ZnONPs (a), gC<sub>3</sub>N<sub>4</sub>@ZnONPs (b), and 5%(Co<sub>3</sub>O<sub>4</sub>-gC<sub>3</sub>N<sub>4</sub>)@ZnONPs (c).

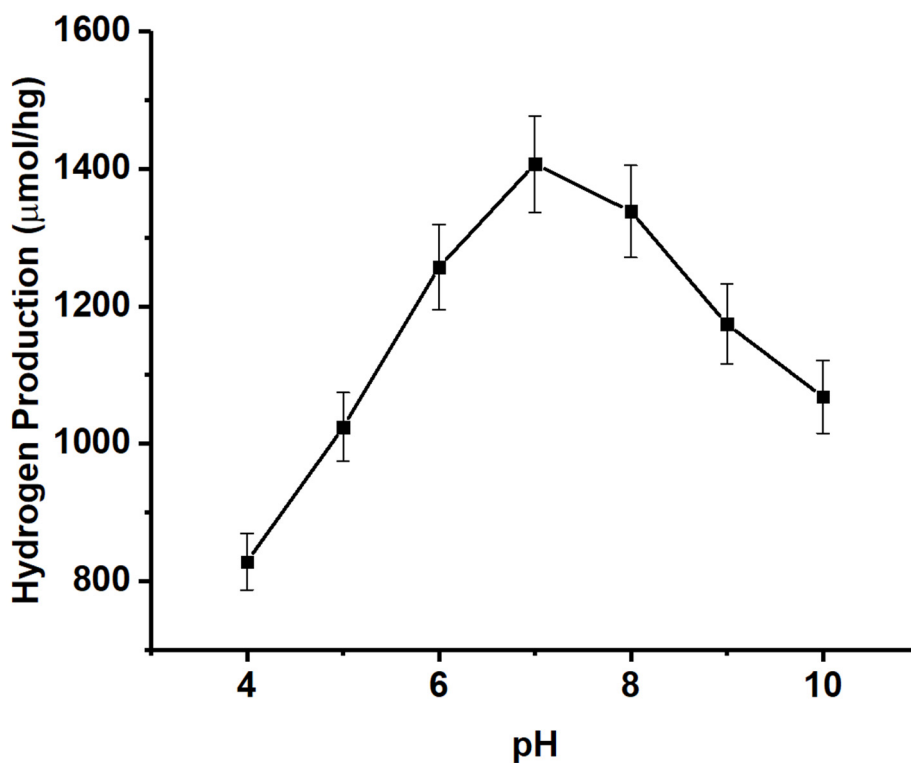

Figure S9. Effect of pH on the photocatalytic activity of the 5%(Co<sub>3</sub>O<sub>4</sub>-gC<sub>3</sub>N<sub>4</sub>)@ZnONPs catalyst for hydrogen production.

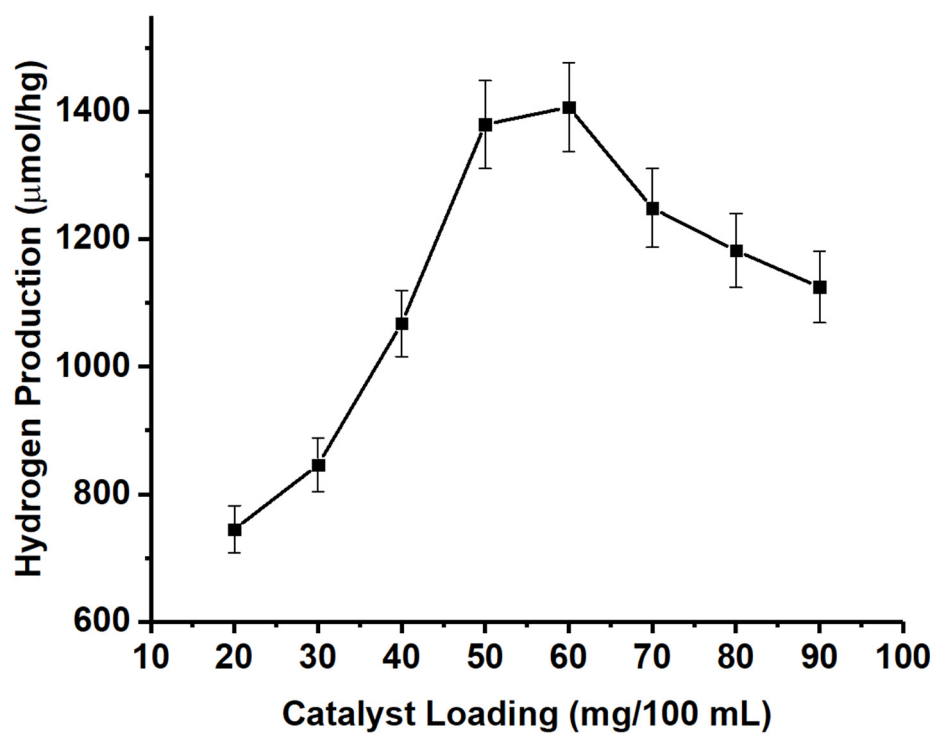

**Figure S10.** Evaluation of the initial concentration of 5%(Co<sub>3</sub>O<sub>4</sub>-gC<sub>3</sub>N<sub>4</sub>)@ZnONPs (a), on the efficiency of hydrogen production.

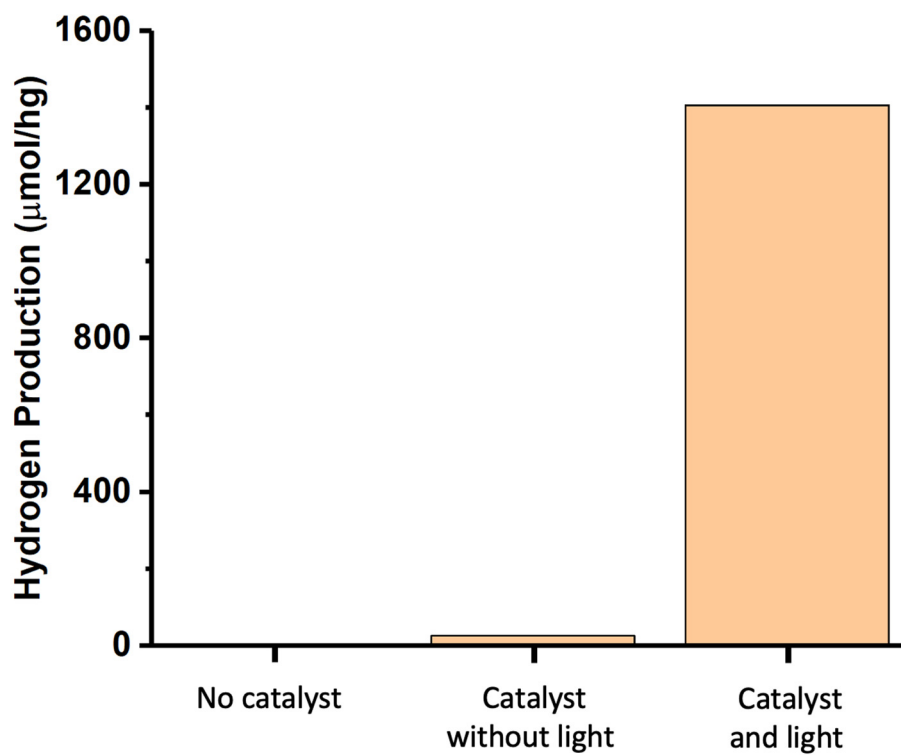

**Figure S11.** Control experiments for 5%(Co<sub>3</sub>O<sub>4</sub>-gC<sub>3</sub>N<sub>4</sub>)@ZnONPs on the efficiency of hydrogen production.

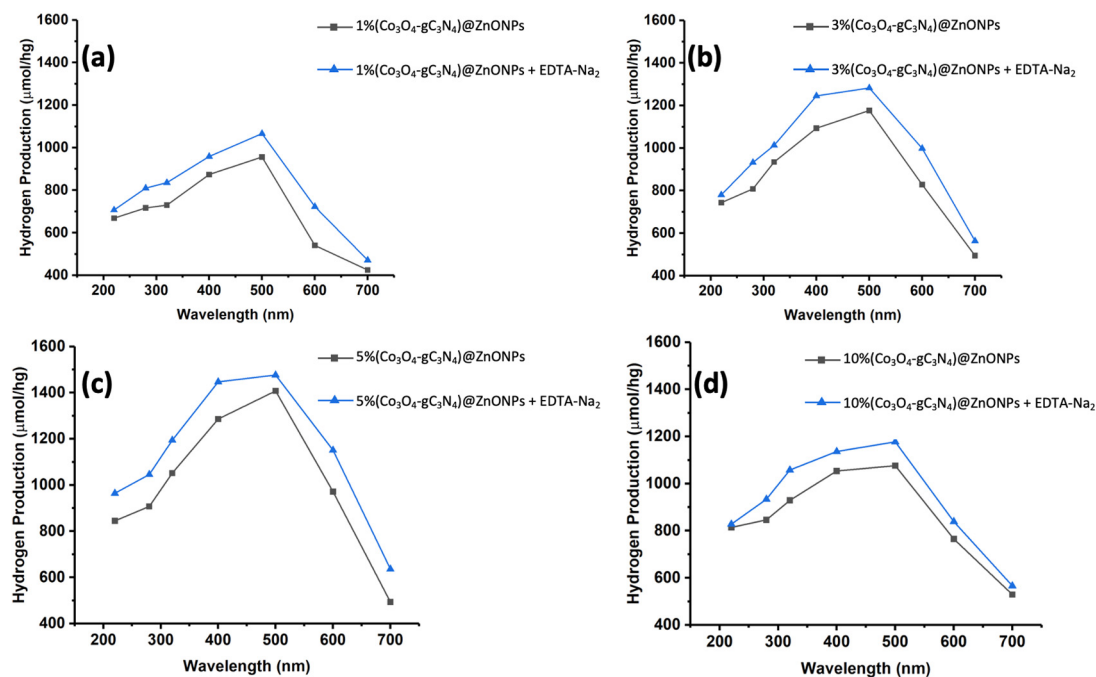

**Figure S12.** Hydrogen production via water splitting using various catalysts under irradiation, and also in the presence of a hole scavenger, namely EDTA- $\text{Na}_2$ . 1%  $(\text{Co}_3\text{O}_4\text{-gC}_3\text{N}_4)\text{@ZnONPs}$  (a), 3%  $(\text{Co}_3\text{O}_4\text{-gC}_3\text{N}_4)\text{@ZnONPs}$  (b), 5%  $(\text{Co}_3\text{O}_4\text{-gC}_3\text{N}_4)\text{@ZnONPs}$  (c), and 10%  $(\text{Co}_3\text{O}_4\text{-gC}_3\text{N}_4)\text{@ZnONPs}$  (d).

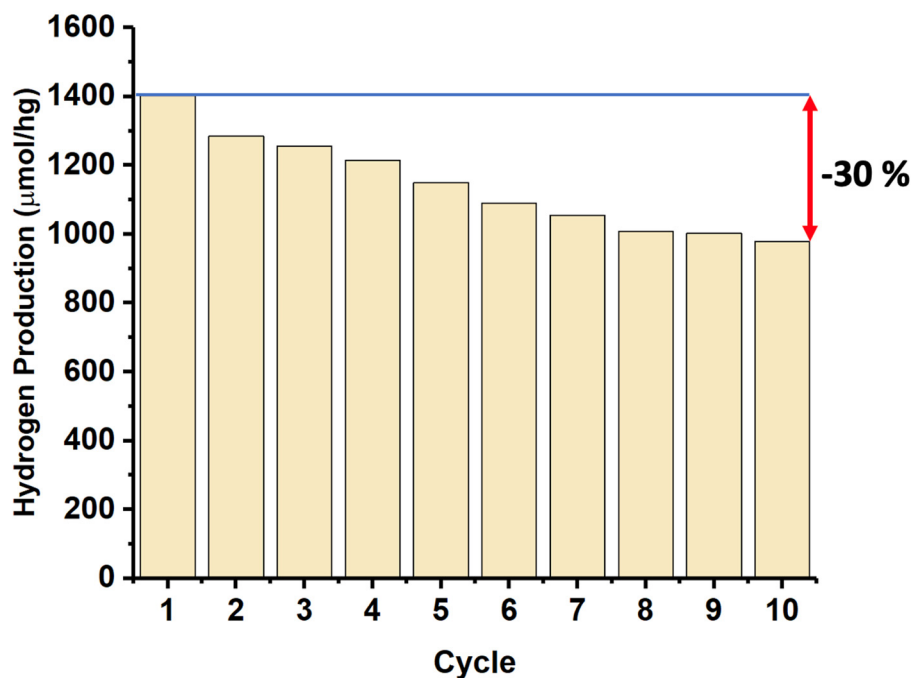

**Figure S13.** Recyclability of 5%  $(\text{Co}_3\text{O}_4\text{-gC}_3\text{N}_4)\text{@ZnONPs}$  after 10 consecutive catalytic cycles of hydrogen production, under irradiation at 500 nm.

**Table S1.** BET surface area of the as-synthesized materials.

| Material                                                                    | BET Area (m <sup>2</sup> /g) |
|-----------------------------------------------------------------------------|------------------------------|
| ZnONPs                                                                      | 76                           |
| Co <sub>3</sub> O <sub>4</sub> -gC <sub>3</sub> N <sub>4</sub>              | 187                          |
| 1%(Co <sub>3</sub> O <sub>4</sub> -gC <sub>3</sub> N <sub>4</sub> )@ZnONPs  | 93                           |
| 3%(Co <sub>3</sub> O <sub>4</sub> -gC <sub>3</sub> N <sub>4</sub> )@ZnONPs  | 127                          |
| 5%(Co <sub>3</sub> O <sub>4</sub> -gC <sub>3</sub> N <sub>4</sub> )@ZnONPs  | 169                          |
| 10%(Co <sub>3</sub> O <sub>4</sub> -gC <sub>3</sub> N <sub>4</sub> )@ZnONPs | 231                          |

**Table S2.** The pseudo-first-order kinetics constants for the photodegradation of CFX using the as-synthesized catalysts.

| Catalyst                                                                    | Apparent Rate <sup>1,2</sup> | Error  |
|-----------------------------------------------------------------------------|------------------------------|--------|
| ZnONPs                                                                      | 0.0189                       | 0.0002 |
| 1%gC <sub>3</sub> N <sub>4</sub> @ZnONPs                                    | 0.0223                       | 0.0004 |
| 3%gC <sub>3</sub> N <sub>4</sub> @ZnONPs                                    | 0.0267                       | 0.0002 |
| 5%gC <sub>3</sub> N <sub>4</sub> @ZnONPs                                    | 0.0292                       | 0.0003 |
| 10%gC <sub>3</sub> N <sub>4</sub> @ZnONPs                                   | 0.0341                       | 0.0005 |
| 1%(Co <sub>3</sub> O <sub>4</sub> -gC <sub>3</sub> N <sub>4</sub> )@ZnONPs  | 0.0306                       | 0.0005 |
| 3%(Co <sub>3</sub> O <sub>4</sub> -gC <sub>3</sub> N <sub>4</sub> )@ZnONPs  | 0.0388                       | 0.0005 |
| 5%(Co <sub>3</sub> O <sub>4</sub> -gC <sub>3</sub> N <sub>4</sub> )@ZnONPs  | 0.0404                       | 0.0003 |
| 10%(Co <sub>3</sub> O <sub>4</sub> -gC <sub>3</sub> N <sub>4</sub> )@ZnONPs | 0.0702                       | 0.0019 |

<sup>1</sup>(k, min<sup>-1</sup>). <sup>2</sup>(R<sup>2</sup> was 0.99 in all cases)**Table S3.** Maximum H<sub>2</sub> production (μmol/hg) by the different catalysts and precursors, under irradiation at several wavelengths. All values obtained are affected by 5% error.

| Catalyst                                                                    | Irradiation Wavelength (nm) |     |      |      |      |     |     |
|-----------------------------------------------------------------------------|-----------------------------|-----|------|------|------|-----|-----|
|                                                                             | 220                         | 280 | 320  | 400  | 500  | 600 | 700 |
| ZnONPs                                                                      | 476                         | 428 | 380  | 349  | 298  | 179 | 116 |
| Co <sub>3</sub> O <sub>4</sub> -gC <sub>3</sub> N <sub>4</sub>              | 450                         | 428 | 422  | 525  | 537  | 379 | 171 |
| gC <sub>3</sub> N <sub>4</sub> @ZnONPs                                      | 436                         | 387 | 312  | 370  | 393  | 227 | 191 |
| 1%(Co <sub>3</sub> O <sub>4</sub> -gC <sub>3</sub> N <sub>4</sub> )@ZnONPs  | 669                         | 716 | 729  | 873  | 956  | 540 | 425 |
| 3%(Co <sub>3</sub> O <sub>4</sub> -gC <sub>3</sub> N <sub>4</sub> )@ZnONPs  | 742                         | 808 | 931  | 1093 | 1176 | 828 | 493 |
| 5%(Co <sub>3</sub> O <sub>4</sub> -gC <sub>3</sub> N <sub>4</sub> )@ZnONPs  | 845                         | 907 | 1052 | 1286 | 1407 | 972 | 492 |
| 10%(Co <sub>3</sub> O <sub>4</sub> -gC <sub>3</sub> N <sub>4</sub> )@ZnONPs | 814                         | 846 | 929  | 1053 | 1076 | 765 | 529 |
